# Supplementary material for: Prognostic models based on postoperative circulating tumor cells can predict poor tumor recurrence-free survival in patients with stage II-III colorectal cancer
Source: PubMed Central journal article supplement (PMC6746136; doi:10.7150/jca.30512), 2019-07-25
Supplement: jcav10p4552s1.pdf [file jcav10p4552s1.pdf]

Table S1. Baseline clinical characteristics of the enrolled patients with stage II-III CRC

| <b>Parameters</b>                             | <b>Values</b>        |
|-----------------------------------------------|----------------------|
| Age (yrs.)                                    | 63.00 (56.00-72.25)  |
| Gender (Male/Female)                          | 76/54                |
| Tumor location (Rectum/Colon)                 | 47/83                |
| T stage (T1-2/T3-4)                           | 20/110               |
| N stage (N0/N1-2)                             | 77/53                |
| TNM stage (II/III)                            | 75/55                |
| Tumor differentiation (Poor/Moderate or well) | 12/116               |
| Preoperative CA125 (U/ml)                     | 3.325 (1.738-9.245)  |
| Preoperative CA19-9 (U/ml)                    | 9.500 (7.000-15.850) |
| Preoperative CA72-4 (U/ml)                    | 9.355 (4.273-21.415) |
| Preoperative CEA (ng/ml)                      | 2.200 (1.240-4.420)  |
| Preoperative CTCs (number)                    | 2.000 (1.000-4.000)  |
| Postoperative CA125 (U/ml)                    | 8.930 (6.340-15.280) |
| Postoperative CA19-9 (U/ml)                   | 6.820 (2.698-15.118) |
| Postoperative CA72-4 (U/ml)                   | 1.540 (0.958-3.433)  |
| Postoperative CEA (ng/ml)                     | 2.250 (1.383-3.363)  |
| Postoperative CTCs (number)                   | 4.000 (1.000-7.000)  |

Abbreviations: CRC, colorectal cancer; CTCs, circulating tumor cells; CEA, carcinoembryonic antigen; CA125, carbohydrate antigen 125; CA19-9, carbohydrate antigen 19-9; CA72-4, carbohydrate antigen 72-4.

Table S2. Associations of preoperative CA72-4 with basal characteristics, pre- and postoperative tumor biomarkers, and tumor recurrence in stage II-III CRC

| Parameters                   | Subgroups     | Preoperative CA72-4 |          | $\chi^2$ | P-value |
|------------------------------|---------------|---------------------|----------|----------|---------|
|                              |               | Negative            | Positive |          |         |
| <b>Gender</b>                | Male          | 68                  | 6        | 0.373    | 0.542   |
|                              | Female        | 47                  | 6        |          |         |
| <b>Age</b>                   | ≤62 yrs       | 52                  | 8        | NA       | 0.225   |
|                              | >62 yrs       | 63                  | 4        |          |         |
| <b>Tumor location</b>        | Rectum        | 41                  | 6        | 0.960    | 0.327   |
|                              | Colon         | 74                  | 6        |          |         |
| <b>T stage</b>               | T1-2          | 16                  | 4        | NA       | 0.096   |
|                              | T3-4          | 99                  | 8        |          |         |
| <b>N stage</b>               | N0            | 68                  | 6        | 0.373    | 0.542   |
|                              | N1-2          | 47                  | 6        |          |         |
| <b>TNM stage</b>             | II            | 67                  | 6        | 0.303    | 0.582   |
|                              | III           | 48                  | 6        |          |         |
| <b>Tumor differentiation</b> | Poor          | 11                  | 1        | NA       | 1.000   |
|                              | Moderate/well | 104                 | 11       |          |         |
| <b>Preoperative CA125</b>    | Negative      | 89                  | 9        | NA       | 0.728   |
|                              | Positive      | 25                  | 3        |          |         |
| <b>Preoperative CA19-9</b>   | Negative      | 102                 | 10       | NA       | 0.634   |
|                              | Positive      | 13                  | 2        |          |         |
| <b>Preoperative CEA</b>      | Negative      | 82                  | 7        | 0.872    | 0.350   |
|                              | Positive      | 33                  | 5        |          |         |
| <b>Preoperative CTCs</b>     | Negative      | 58                  | 8        | NA       | 0.369   |

|                             |               |     |    |       |              |
|-----------------------------|---------------|-----|----|-------|--------------|
|                             | Positive      | 57  | 4  |       |              |
| <b>Postoperative CA125</b>  | Negative      | 64  | 8  | NA    | 0.721        |
|                             | Positive      | 26  | 2  |       |              |
| <b>Postoperative CA19-9</b> | Negative      | 104 | 10 | NA    | 0.354        |
|                             | Positive      | 11  | 2  |       |              |
| <b>Postoperative CA72-4</b> | Negative      | 108 | 8  | NA    | <b>0.011</b> |
|                             | Positive      | 7   | 4  |       |              |
| <b>Postoperative CEA</b>    | Negative      | 106 | 9  | NA    | 0.087        |
|                             | Positive      | 9   | 3  |       |              |
| <b>Postoperative CTCs</b>   | Negative      | 56  | 6  | 0.007 | 0.931        |
|                             | Positive      | 59  | 6  |       |              |
| <b>Tumor recurrence</b>     | No recurrence | 90  | 9  | NA    | 0.393        |
|                             | Recurrence    | 15  | 3  |       |              |

---

Abbreviations: CRC, colorectal cancer; CTCs, circulating tumor cells; CEA, carcinoembryonic antigen; CA125, carbohydrate antigen 125; CA19-9, carbohydrate antigen 19-9; CA72-4, carbohydrate antigen 72-4.

Note: NA, not applicable and indicated the association was determined by Fisher's exact test. Bold, indicates the association was significant; Italic, indicates a trend of association ( $0.05 \leq P < 0.1$ ).

Table S3. Associations of postoperative CA72-4 with basal characteristics, pre- and postoperative tumor biomarkers, and tumor recurrence in stage II-III CRC

| Parameters                   | Subgroups     | Postoperative CA72-4 |          | $\chi^2$ | P-value      |
|------------------------------|---------------|----------------------|----------|----------|--------------|
|                              |               | Negative             | Positive |          |              |
| <b>Gender</b>                | Male          | 70                   | 6        | 0.076    | 0.783        |
|                              | Female        | 49                   | 5        |          |              |
| <b>Age</b>                   | ≤62 yrs       | 55                   | 6        | 0.280    | 0.596        |
|                              | >62 yrs       | 64                   | 5        |          |              |
| <b>Tumor location</b>        | Rectum        | 42                   | 5        | 0.450    | 0.502        |
|                              | Colon         | 77                   | 6        |          |              |
| <b>T stage</b>               | T1-2          | 16                   | 4        | NA       | 0.066        |
|                              | T3-4          | 103                  | 7        |          |              |
| <b>N stage</b>               | N0            | 72                   | 5        | 0.944    | 0.331        |
|                              | N1-2          | 47                   | 6        |          |              |
| <b>TNM stage</b>             | II            | 69                   | 6        | 0.049    | 0.825        |
|                              | III           | 50                   | 5        |          |              |
| <b>Tumor differentiation</b> | Poor          | 11                   | 1        | NA       | 1.000        |
|                              | Moderate/well | 106                  | 10       |          |              |
| <b>Preoperative CA125</b>    | Negative      | 93                   | 7        | 1.330    | 0.249        |
|                              | Positive      | 25                   | 4        |          |              |
| <b>Preoperative CA19-9</b>   | Negative      | 106                  | 9        | NA       | 0.615        |
|                              | Positive      | 13                   | 2        |          |              |
| <b>Preoperative CA72-4</b>   | Negative      | 108                  | 7        | NA       | <b>0.011</b> |
|                              | Positive      | 8                    | 4        |          |              |

|                             |               |     |   |        |                  |
|-----------------------------|---------------|-----|---|--------|------------------|
| <b>Preoperative CEA</b>     | Negative      | 82  | 8 | NA     | 0.546            |
|                             | Positive      | 37  | 3 |        |                  |
| <b>Preoperative CTCs</b>    | Negative      | 58  | 8 | NA     | 0.207            |
|                             | Positive      | 61  | 3 |        |                  |
| <b>Postoperative CA125</b>  | Negative      | 67  | 5 | 4.320  | <b>0.038</b>     |
|                             | Positive      | 22  | 6 |        |                  |
| <b>Postoperative CA19-9</b> | Negative      | 108 | 9 | 0.894  | 0.344            |
|                             | Positive      | 11  | 2 |        |                  |
| <b>Postoperative CEA</b>    | Negative      | 110 | 8 | 4.669  | <b>0.031</b>     |
|                             | Positive      | 9   | 3 |        |                  |
| <b>Postoperative CTCs</b>   | Negative      | 60  | 3 | 2.160  | 0.142            |
|                             | Positive      | 59  | 8 |        |                  |
| <b>Tumor recurrence</b>     | No recurrence | 97  | 5 | 14.854 | <b>&lt;0.001</b> |
|                             | Recurrence    | 12  | 6 |        |                  |

---

Abbreviations: CRC, colorectal cancer; CTCs, circulating tumor cells; CEA, carcinoembryonic antigen; CA125, carbohydrate antigen 125; CA19-9, carbohydrate antigen 19-9; CA72-4, carbohydrate antigen 72-4.

Note: NA, not applicable and indicated the association was determined by Fisher's exact test. Bold, indicates the association was significant; Italic, indicates a trend of association ( $0.05 \leq P < 0.1$ ).
